# Supplementary material
Source: PubMed Central journal article supplement (PMC9157139)

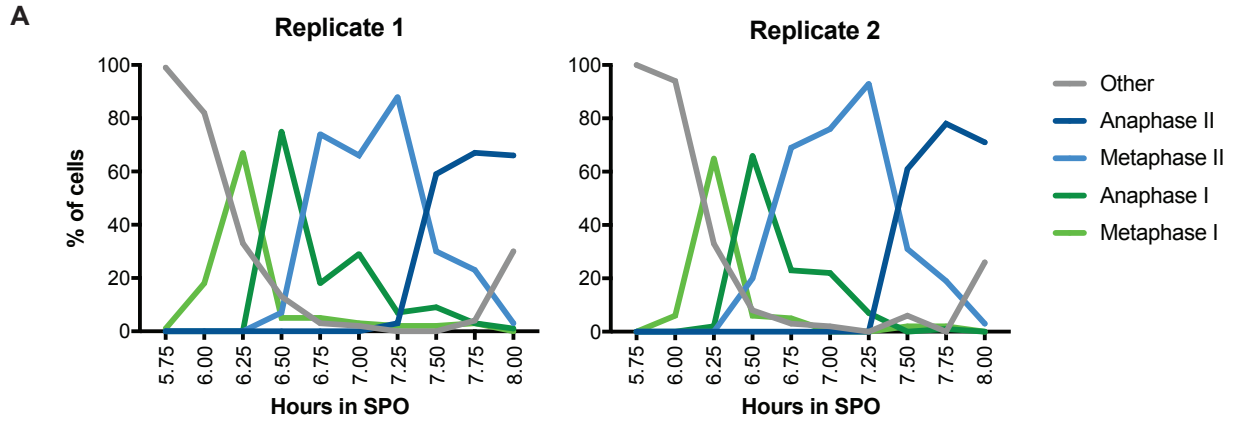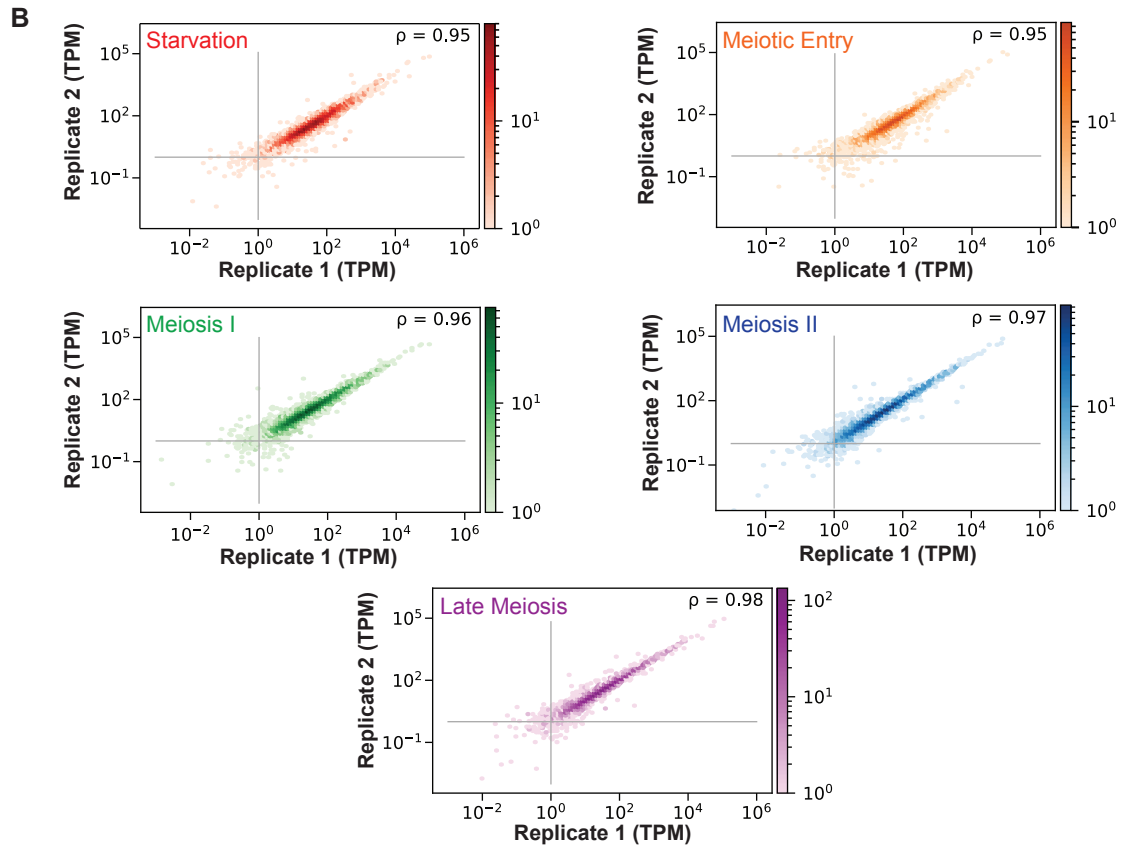

Supplemental Figure 1. Sing et al., 2022

Supplement: iyac066_supplemental_figure_1.pdf [file iyac066_supplemental_figure_1.pdf]

**A**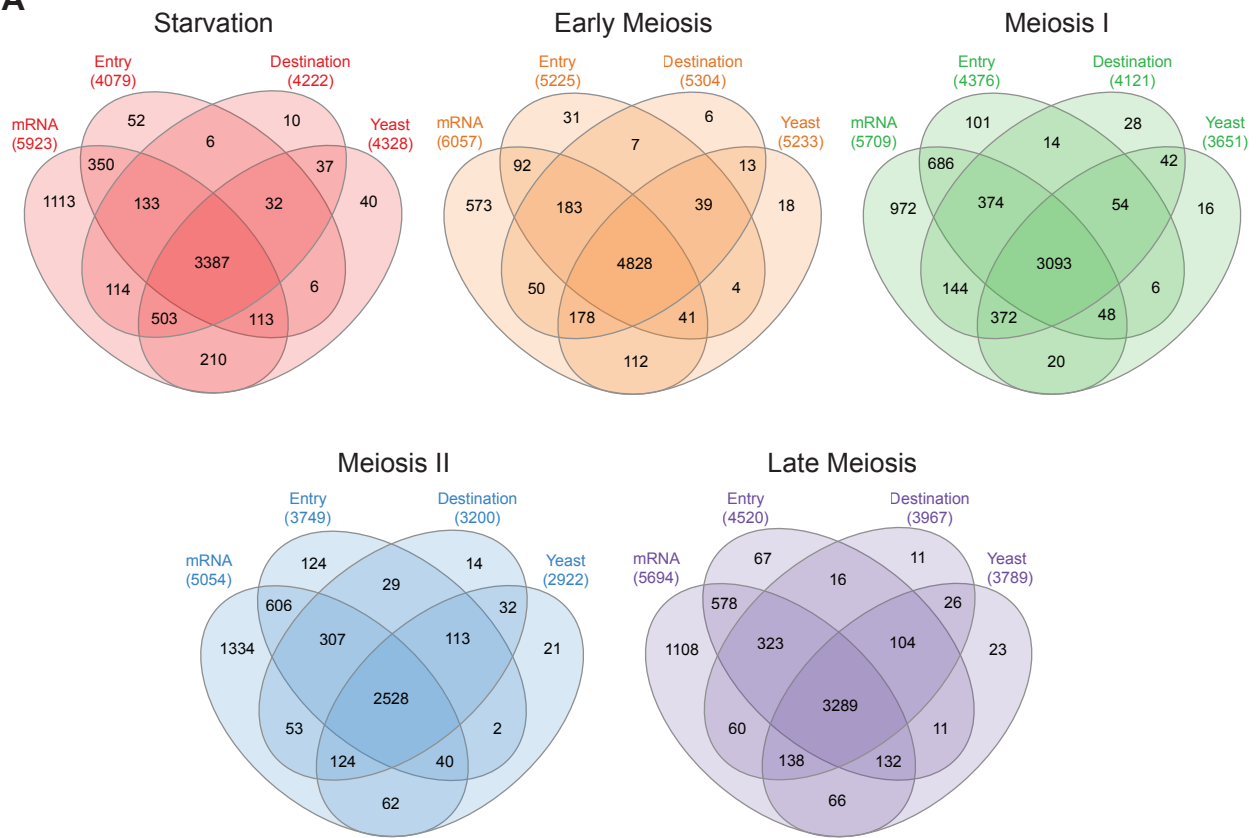**B**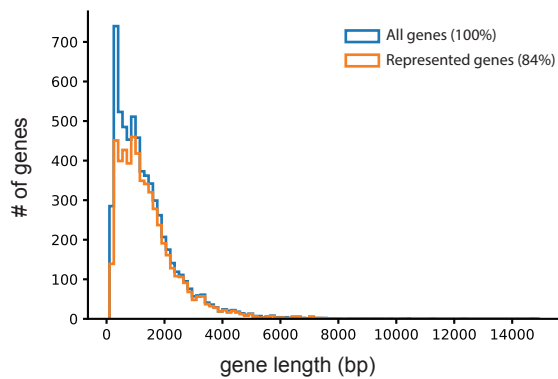**C**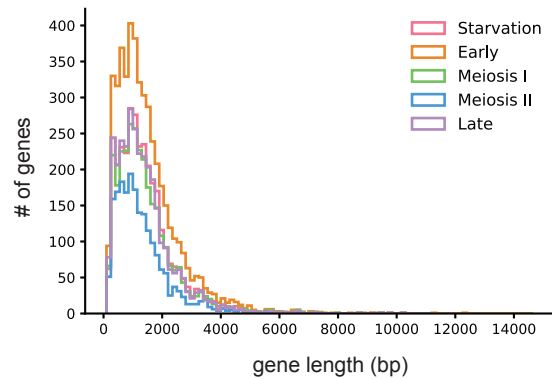

Supplemental Figure 2. Sing et al., 2022

Supplement: iyac066_supplemental_figure_2.pdf [file iyac066_supplemental_figure_2.pdf]

**A**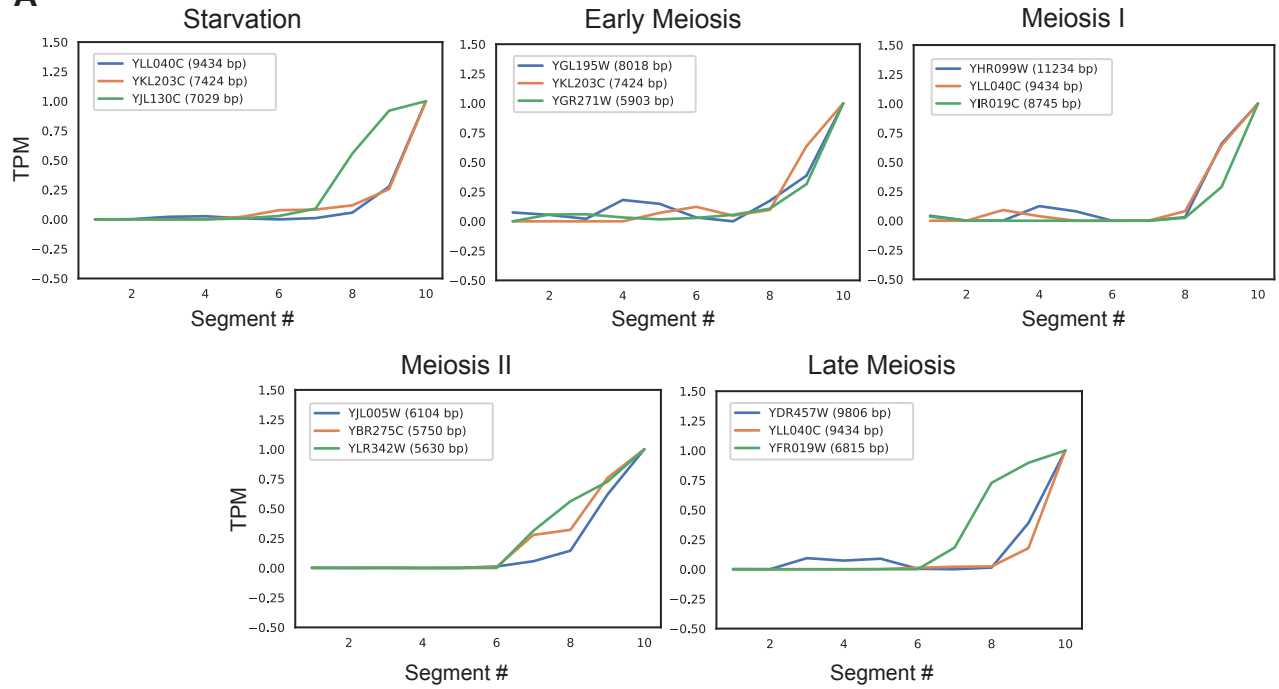

Supplemental Figure 3. Sing et al., 2022

Supplement: iyac066_supplemental_figure_3.pdf [file iyac066_supplemental_figure_3.pdf]

**A**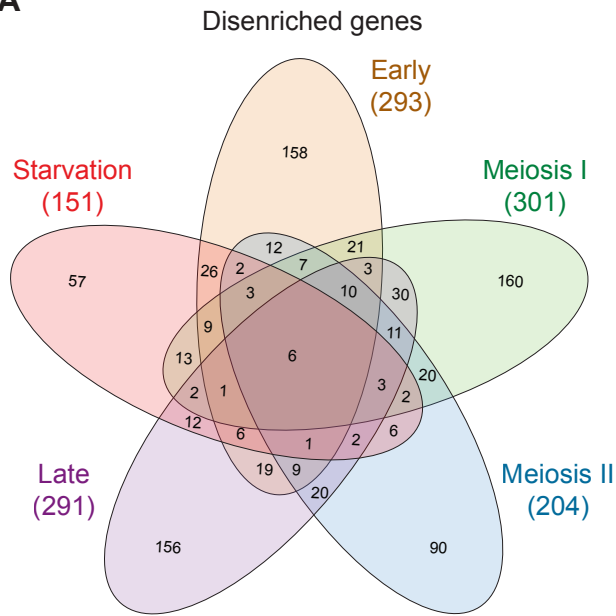**B**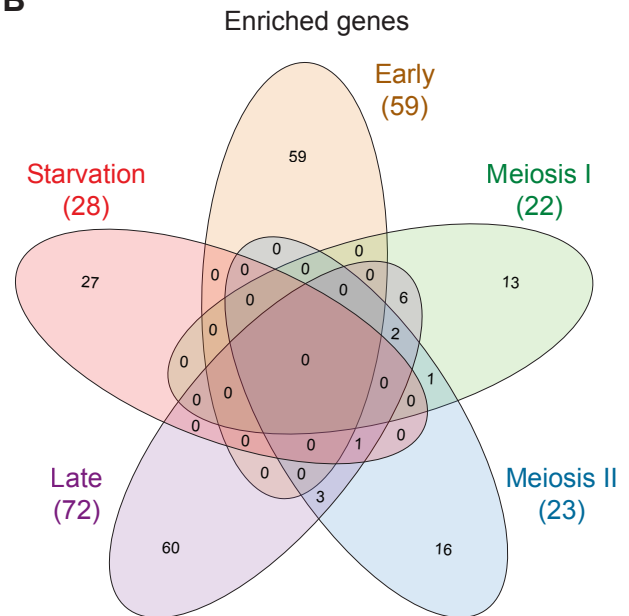

Supplemental Figure 4. Sing et al., 2022

Supplement: iyac066_supplemental_figure_4.pdf [file iyac066_supplemental_figure_4.pdf]

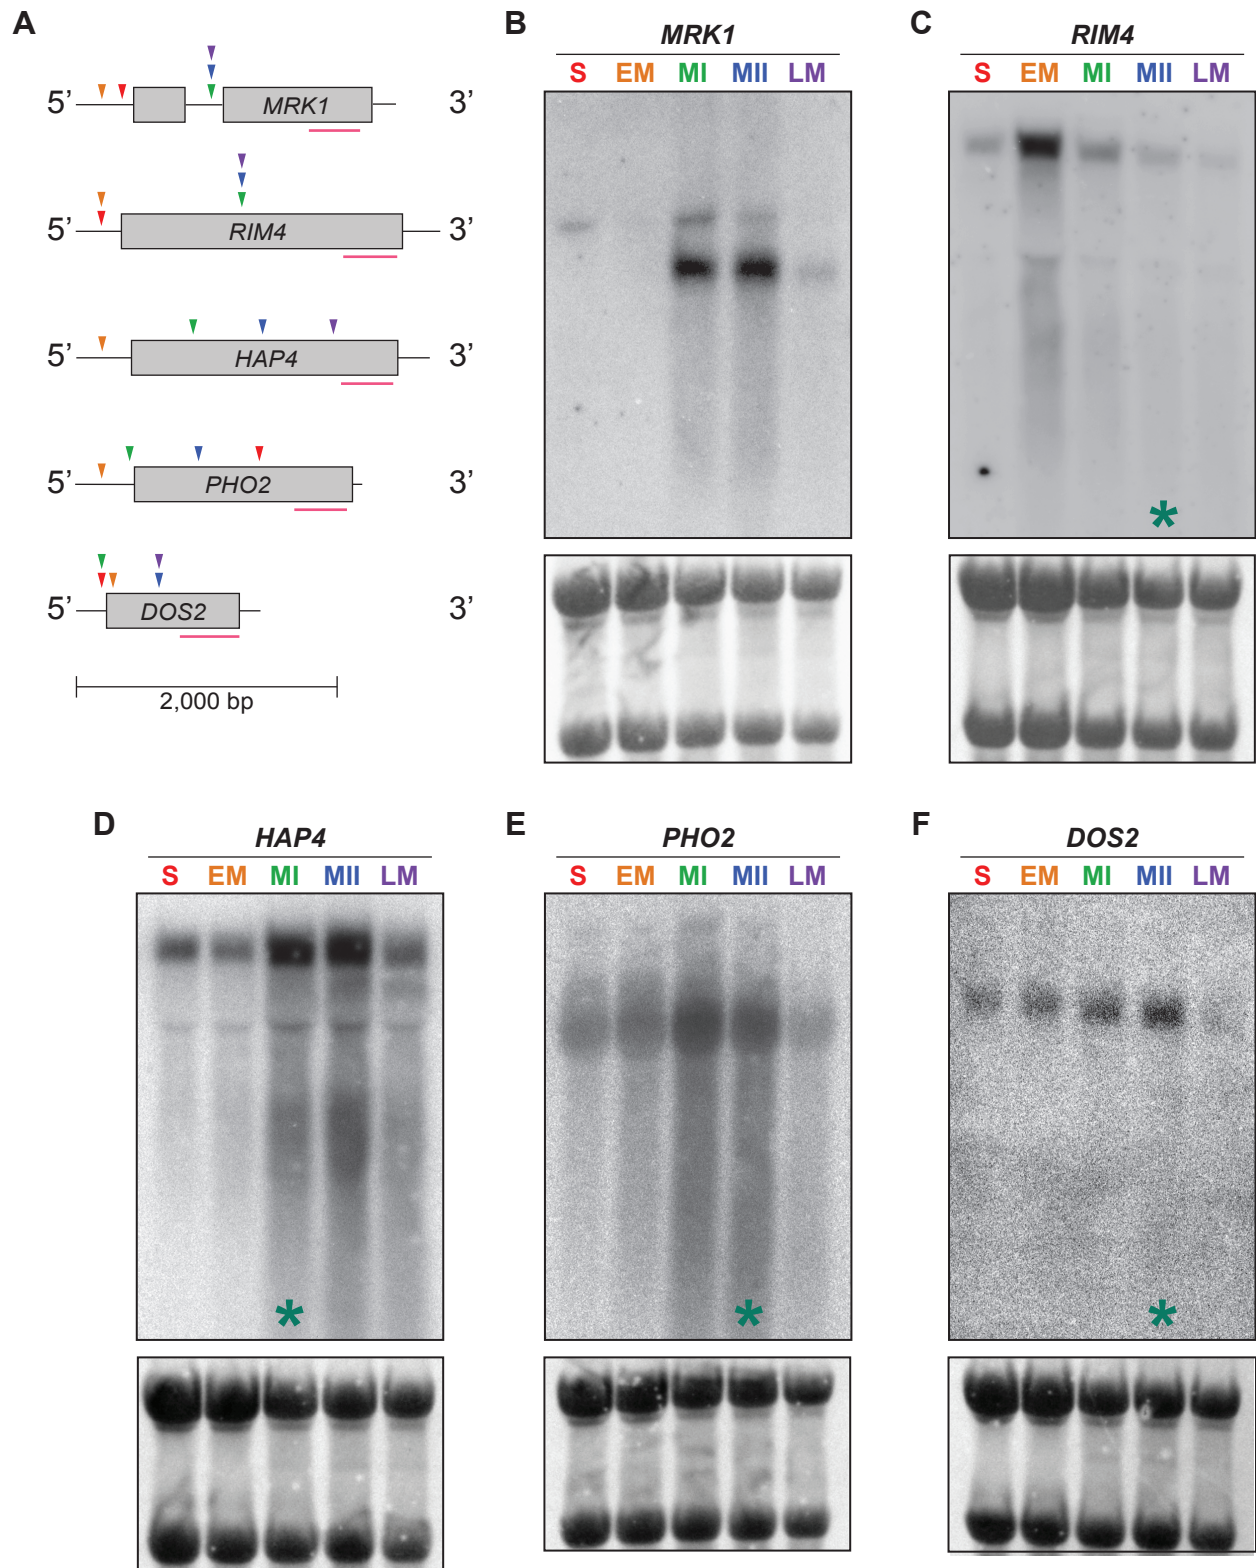

Supplemental Figure 5. Sing et al., 2022

Supplement: iyac066_supplemental_figure_5.pdf [file iyac066_supplemental_figure_5.pdf]

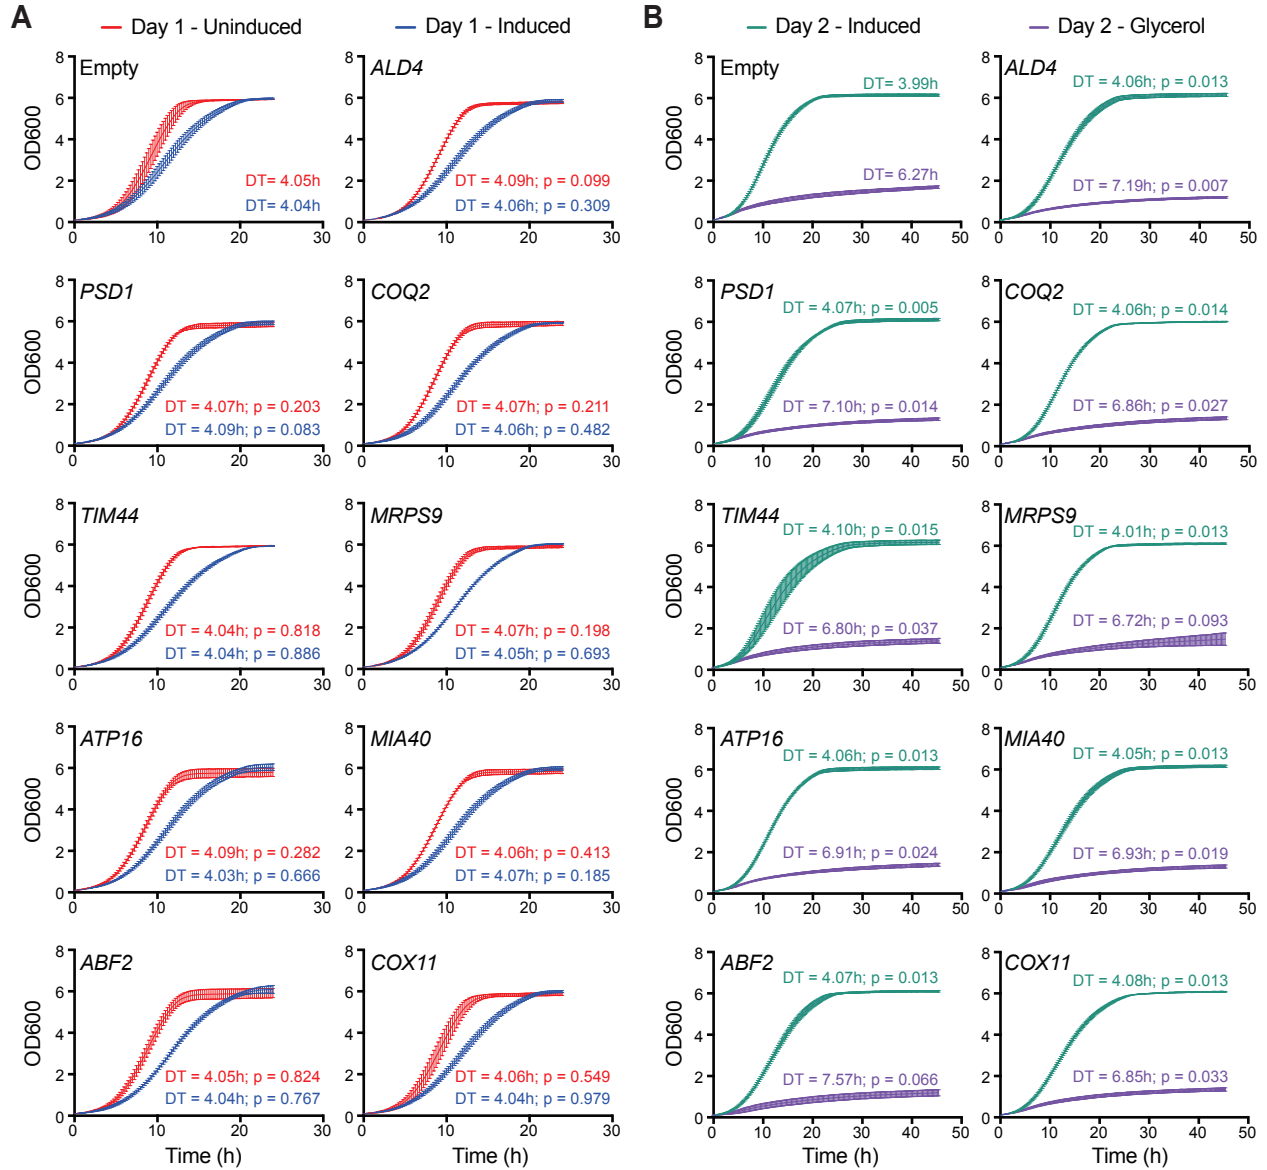

Supplemental Figure 6. Sing et al., 2022

Supplement: iyac066_supplemental_figure_6.pdf [file iyac066_supplemental_figure_6.pdf]
